# Supplementary material
Source: PubMed Central journal article supplement (PMC5010492)
Supplement: NIHMS778517-supplement-4.pdf [file NIHMS778517-supplement-4.pdf]

**Supplementary Table 2. Relationship of NAMPT inhibitor sensitivity, *MYC/MYCN* amplification, and Myc/N-Myc protein expression status in glioblastoma tumorsphere lines**

| <b>Tumorsphere Line</b> | <b>FK866 (IC<sub>50</sub>, nM)</b> | <b>GMX1778 (IC<sub>50</sub>, nM)</b> | <b>Amplified Gene</b> | <b>c-Myc/N-Myc Protein Expression</b> | <b><i>IDH1/2</i> status</b> | <b><i>MGMT</i> promotor methylation status</b> |
|-------------------------|------------------------------------|--------------------------------------|-----------------------|---------------------------------------|-----------------------------|------------------------------------------------|
| MGG4                    | 2.5                                | 5.6                                  | <i>MYC</i>            | c-Myc                                 | WT                          | Met                                            |
| MGG6                    | 1.3                                | 1.9                                  | <i>MYCN</i>           | N-Myc, c-Myc                          | WT                          | Met                                            |
| MGG8                    | 2.7                                | 6.4                                  | <i>MYCN</i>           | N-Myc                                 | WT                          | Met                                            |
| MGG18                   | >10000                             | >10000                               | no                    | c-Myc                                 | WT                          | Met                                            |
| MGG23                   | >10000                             | >10000                               | no                    | no                                    | WT                          | Unmet                                          |
| MGG85                   | >10000                             | >10000                               | no                    | no                                    | WT                          | Unmet                                          |
| MGG91                   | >10000                             | >10000                               | no                    | c-Myc                                 | WT                          | Met                                            |
| MGG102                  | >10000                             | >10000                               | no                    | N/A                                   | WT                          | Unmet                                          |
| MGG171                  | >10000                             | >10000                               | no                    | no                                    | WT                          | Unmet                                          |
| NHA                     | >10000                             | >10000                               | N/A                   | N/A                                   | WT                          | N/A                                            |

Abbreviations: NHA, normal human astrocyte; WT, wild-type; Met, methylated; Unmet, unmethylated; N/A, not available.
