# Supplementary material
Source: PubMed Central journal article supplement (PMC5010492)
Supplement: NIHMS778517-supplement-5.pdf [file NIHMS778517-supplement-5.pdf]

## Supplemental Table S3

### Quantitative Estimation of Target Metabolites (Total Amount)

| Metabolite                 | KEGG ID                              | Concentration (pmol/10 <sup>6</sup> cells) |        |        |            |          |          |           |      |            |      | Comparative Analysis    |                      |
|----------------------------|--------------------------------------|--------------------------------------------|--------|--------|------------|----------|----------|-----------|------|------------|------|-------------------------|----------------------|
|                            |                                      | DMSO 48hr                                  |        |        | FK866 48hr |          |          | DMSO 48hr |      | FK866 48hr |      | FK866 48hr vs DMSO 48hr |                      |
|                            |                                      | MGG4-1                                     | MGG4-2 | MGG4-3 | MGG4FK-1   | MGG4FK-2 | MGG4FK-3 | Mean      | S.D. | Mean       | S.D. | Ratio <sup>†</sup>      | p-value <sup>‡</sup> |
| 2-Phosphoglyceric acid     | <a href="#">C00631</a>               | 4.6                                        | 2.3    | 3.0    | 5.2        | 4.3      | 3.8      | 3.3       | 1.2  | 4.4        | 0.7  | 1.3                     | 0.239                |
| 3-Phosphoglyceric acid     | <a href="#">C00197</a>               | 16                                         | 19     | 20     | 24         | 21       | 23       | 18        | 2.0  | 23         | 1.7  | 1.3                     | 0.039                |
| ATP                        | <a href="#">C00002</a>               | 4,833                                      | 4,411  | 4,790  | 1,060      | 1,078    | 1,061    | 4,678     | 232  | 1,066      | 10   | 0.2                     | 0.001                |
| Dihydroxyacetone phosphate | <a href="#">C00111</a>               | 84                                         | 87     | 99     | 2,360      | 2,709    | 2,660    | 90        | 8.0  | 2,576      | 189  | 29                      | 0.002                |
| Fructose 1,6-diphosphate   | <a href="#">C00354</a>               | 121                                        | 105    | 123    | 9,597      | 9,872    | 9,716    | 116       | 9.8  | 9,728      | 138  | 84                      | 6.3E-05              |
| Fructose 6-phosphate       | <a href="#">C05345,C00085</a>        | 7.2                                        | 7.8    | 10     | 46         | 44       | 45       | 8.5       | 1.7  | 45         | 1.0  | 5.3                     | 3.9E-05              |
| Glucose 6-phosphate        | <a href="#">C00668,C01172,C00092</a> | 27                                         | 22     | 25     | 161        | 163      | 154      | 25        | 2.5  | 159        | 4.5  | 6.5                     | 1.8E-05              |
| Glyceraldehyde 3-phosphate | <a href="#">C00118,C00661</a>        | 28                                         | 28     | 35     | 424        | 483      | 442      | 31        | 3.6  | 449        | 30   | 15                      | 0.002                |
| Lactic acid                | <a href="#">C00186,C00256,C01432</a> | 6,228                                      | 5,330  | 5,430  | 2,304      | 3,110    | 2,823    | 5,663     | 493  | 2,746      | 409  | 0.5                     | 0.002                |
| Phosphoenolpyruvic acid    | <a href="#">C00074</a>               | 17                                         | 14     | 14     | 15         | 13       | 9.7      | 15        | 1.4  | 12         | 2.6  | 0.8                     | 0.225                |
| Pyruvic acid               | <a href="#">C00022</a>               | 74                                         | 61     | 72     | 44         | 53       | 52       | 69        | 7.0  | 50         | 5.0  | 0.7                     | 0.022                |

ID consists of analysis mode and number. 'A' showed anion mode.

N.D. (Not Detected): The target peak or metabolite was below detection limits.

N.A. (Not Available): The calculation was impossible because of insufficiency of the data.
